# Supplementary material for: Discovering Transcription Factor Binding Sites in Highly Repetitive Regions of Genomes with Multi-Read Analysis of ChIP-Seq Data
Source: PubMed Central journal article supplement (PMC3136429; doi:10.1371/journal.pcbi.1002111), 2011-07-14
Supplement: pcbi.1002111.s004.pdf [file pcbi.1002111.s004.pdf]

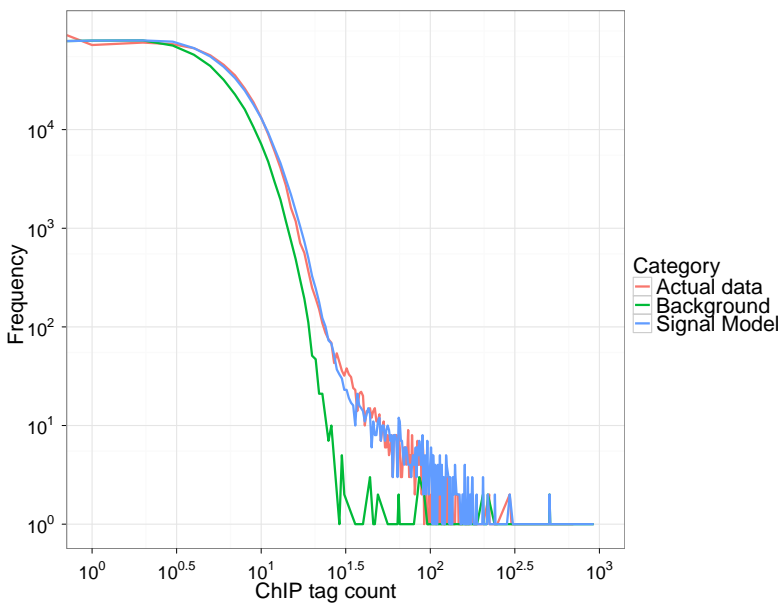

(a) GATA1 UR Sample.

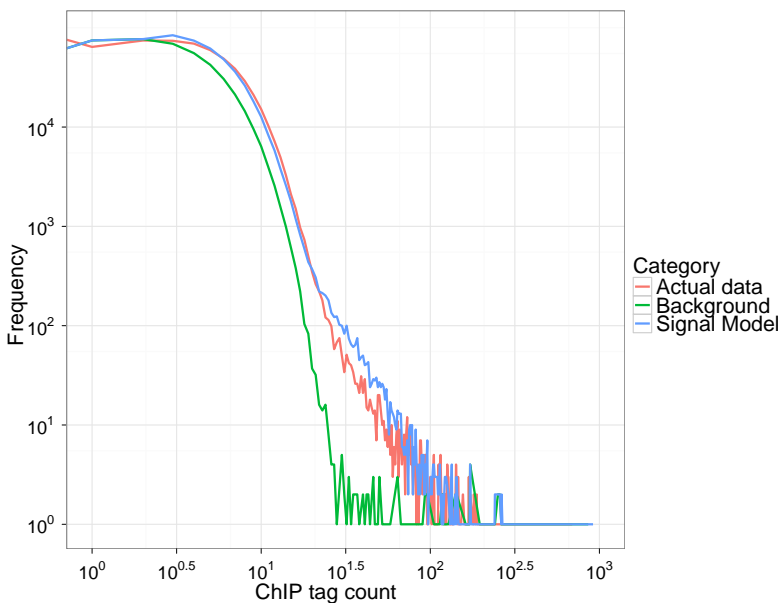

(b) GATA1 MR Sample.
