# Supplementary material for: Discovering Transcription Factor Binding Sites in Highly Repetitive Regions of Genomes with Multi-Read Analysis of ChIP-Seq Data
Source: PubMed Central journal article supplement (PMC3136429; doi:10.1371/journal.pcbi.1002111), 2011-07-14
Supplement: pcbi.1002111.s024.pdf [file pcbi.1002111.s024.pdf]

---

|                             | Common (22420) | MR-only (3255) |
|-----------------------------|----------------|----------------|
| No shared multi-reads       | 12125 (54.08%) | 613 (18.83%)   |
| Similarity score $> 0.5$    | 108 (0.48%)    | 564 (17.33%)   |
| Similarity score $\leq 0.5$ | 10187 (45.44%) | 2078 (63.84%)  |

---
