# Supplementary material for: Discovering Transcription Factor Binding Sites in Highly Repetitive Regions of Genomes with Multi-Read Analysis of ChIP-Seq Data
Source: PubMed Central journal article supplement (PMC3136429; doi:10.1371/journal.pcbi.1002111), 2011-07-14
Supplement: pcbi.1002111.s026.pdf [file pcbi.1002111.s026.pdf]

---

|                             | Common (6024) | MR-only (2838) |
|-----------------------------|---------------|----------------|
| No shared multi-reads       | 5575 (92.55%) | 783 (27.59%)   |
| Similarity score $> 0.5$    | 5 (0.08%)     | 349 (12.30%)   |
| Similarity score $\leq 0.5$ | 444 (7.37%)   | 1706 (60.11%)  |

---
