# Supplementary material for: Discovering Transcription Factor Binding Sites in Highly Repetitive Regions of Genomes with Multi-Read Analysis of ChIP-Seq Data
Source: PubMed Central journal article supplement (PMC3136429; doi:10.1371/journal.pcbi.1002111), 2011-07-14
Supplement: pcbi.1002111.s027.pdf [file pcbi.1002111.s027.pdf]

|                             | Equal contribution of the weights<br>to the peak pair | Significantly different contribution<br>of the weights to the peak pair |
|-----------------------------|-------------------------------------------------------|-------------------------------------------------------------------------|
| Similarity score $> 0.5$    | 130 (11)                                              | 219 (33)                                                                |
| Similarity score $\leq 0.5$ | 489 (415)                                             | 1216 (904)                                                              |
