# Supplementary material for: Discovering Transcription Factor Binding Sites in Highly Repetitive Regions of Genomes with Multi-Read Analysis of ChIP-Seq Data
Source: PubMed Central journal article supplement (PMC3136429; doi:10.1371/journal.pcbi.1002111), 2011-07-14
Supplement: pcbi.1002111.s028.pdf [file pcbi.1002111.s028.pdf]

All common and MR-only peaks

| Repeat Type         | Common peaks (22420 peaks) | MR-only peaks (2546 peaks) |
|---------------------|----------------------------|----------------------------|
| DNA                 | 0.100401427                | 0.071484682                |
| LINE                | 0.209678858                | 0.190102121                |
| Low_complexity      | 0.09014273                 | 0.045168892                |
| LTR                 | 0.145272079                | 0.33503535                 |
| Other               | 0.000223015                | 0                          |
| RC/Helitron         | 0.000401427                | 0                          |
| RNA                 | 0.000133809                | 0.000392773                |
| rRNA                | 8.92E-05                   | 0.001571092                |
| Satellite           | 0.000490633                | 0.04752553                 |
| scRNA               | 0.000356824                | 0.001178319                |
| Simple_repeat       | 0.087823372                | 0.06991359                 |
| SINE                | 0.296253345                | 0.223095051                |
| snRNA               | 0.001516503                | 0.003534957                |
| srpRNA              | 0.000223015                | 0                          |
| tRNA                | 0.005396967                | 0.004713276                |
| Unknown             | 0.002319358                | 0.001178319                |
| Unknown?            | 8.92E-05                   | 0                          |
| ANY Repeat Elements | 0.641971454                | 0.754516889                |

Common and MR-only peaks in NONE category

| Repeat Type         | Common peaks (8782 peaks) | MR-only peaks (667 peaks) |
|---------------------|---------------------------|---------------------------|
| DNA                 | 0.112275                  | 0.052474                  |
| LINE                | 0.232179                  | 0.202399                  |
| Low_complexity      | 0.047028                  | 0.017991                  |
| LTR                 | 0.226144                  | 0.584708                  |
| Other               | 0.000455                  | 0                         |
| RC/Helitron         | 0.000455                  | 0                         |
| RNA                 | 0.000228                  | 0                         |
| rRNA                | 0.000228                  | 0.001499                  |
| Satellite           | 0.000342                  | 0.112444                  |
| scRNA               | 0.000569                  | 0.001499                  |
| Simple_repeat       | 0.069346                  | 0.056972                  |
| SINE                | 0.2931                    | 0.158921                  |
| snRNA               | 0.000797                  | 0.004498                  |
| srpRNA              | 0.000342                  | 0                         |
| tRNA                | 0.008426                  | 0                         |
| Unknown             | 0.002847                  | 0                         |
| Unknown?            | 0.000114                  | 0                         |
| ANY Repeat Elements | 0.673423                  | 0.953523                  |
