# Supplementary material for: Discovering Transcription Factor Binding Sites in Highly Repetitive Regions of Genomes with Multi-Read Analysis of ChIP-Seq Data
Source: PubMed Central journal article supplement (PMC3136429; doi:10.1371/journal.pcbi.1002111), 2011-07-14
Supplement: pcbi.1002111.s029.pdf [file pcbi.1002111.s029.pdf]

All common and MR-only peaks

| Repeat Type          | Common peaks(6024 peaks) | MR-only peaks (2146 peaks) |
|----------------------|--------------------------|----------------------------|
| DNA                  | 0.027722                 | 0.014911                   |
| LINE                 | 0.083997                 | 0.190121                   |
| Low_complexity       | 0.028718                 | 0.025629                   |
| LTR                  | 0.108898                 | 0.342032                   |
| Other                | 0.004316                 | 0.00699                    |
| RC/Helitron          | 0.000166                 | 0                          |
| RNA                  | 0.000996                 | 0                          |
| rRNA                 | 0.000664                 | 0.003728                   |
| Satellite            | 0.001328                 | 0.002796                   |
| scRNA                | 0.001494                 | 0.001398                   |
| Simple_repeat        | 0.101262                 | 0.094129                   |
| SINE                 | 0.258134                 | 0.140727                   |
| snRNA                | 0.000664                 | 0.003728                   |
| srpRNA               | 0.000166                 | 0.001398                   |
| tRNA                 | 0.002656                 | 0                          |
| Unknown              | 0.001826                 | 0.001864                   |
| Unknown/Y-chromosome | 0.000166                 | 0                          |
| ANY Repeat Elements  | 0.48755                  | 0.658434                   |

Common and MR-only peaks in NONE category

| Repeat Type          | Common peaks (1347 peaks) | MR-only peaks (526 peaks) |
|----------------------|---------------------------|---------------------------|
| DNA                  | 0.03118                   | 0.003802                  |
| LINE                 | 0.092799                  | 0.226236                  |
| Low_complexity       | 0.03712                   | 0.011407                  |
| LTR                  | 0.164811                  | 0.456274                  |
| Other                | 0.008909                  | 0.011407                  |
| RC/Helitron          | 0                         | 0                         |
| RNA                  | 0.000742                  | 0                         |
| rRNA                 | 0.001485                  | 0.005703                  |
| Satellite            | 0.000742                  | 0.001901                  |
| scRNA                | 0.001485                  | 0                         |
| Simple_repeat        | 0.124722                  | 0.072243                  |
| SINE                 | 0.242762                  | 0.074144                  |
| snRNA                | 0.000742                  | 0.005703                  |
| srpRNA               | 0                         | 0                         |
| tRNA                 | 0.002227                  | 0                         |
| Unknown              | 0.00297                   | 0                         |
| Unknown/Y-chromosome | 0                         | 0                         |
| ANY Repeat Elements  | 0.539718                  | 0.764259                  |
