# Supplementary material for: Discovering Transcription Factor Binding Sites in Highly Repetitive Regions of Genomes with Multi-Read Analysis of ChIP-Seq Data
Source: PubMed Central journal article supplement (PMC3136429; doi:10.1371/journal.pcbi.1002111), 2011-07-14
Supplement: pcbi.1002111.s030.pdf [file pcbi.1002111.s030.pdf]

| SI No | Name            | Peak position            | Primer sequence (5'-3')        |
|-------|-----------------|--------------------------|--------------------------------|
| 1     | Pb1 Forward     | Chr14:31892400:31892999  | GTGGTCTTGAATTTCTTTTGGATTC      |
| 2     | Pb1 Reverse     | Chr14:31892400:31892999  | TCAATGGACCCAAATCCCC            |
| 3     | Srsf3 Forward   | Chr17:29178600:29178999  | ATAAACCTTAGGTCCTGCCAGT         |
| 4     | Srsf3 Reverse   | Chr17:29178600:29178999  | GTGTCTCAGCTACTAGAGGACTATAGCTTC |
| 5     | ligp2 Forward   | Chr11:58028200:58028999  | TCGGAGTGCCTGGTGTCTG            |
| 6     | ligp2 Reverse   | Chr11:58028200:58028999  | AAGACCCACAAACCCAGGG            |
| 7     | Polr3h Forward  | Chr15:81745000:81745599  | AAGATGGTGACCAGACCTGCTT         |
| 8     | Polr3h Reverse  | Chr15:81745000:81745599  | CAAACCTGAACAGGAAGGCGG          |
| 9     | Zfp637 Forward  | Chr6:117794600:117794999 | GTGATCGCCCCATGCTCCCA           |
| 10    | Zfp637 Reverse  | Chr6:117794600:117794999 | GGCTTCTGATGTGCCGGGCAT          |
| 11    | Prim2 Forward   | Chr1:33687600:33688599   | TTTTATCCGGTAAAGCGAATGATTAG     |
| 12    | Prim2 Reverse   | Chr1:33687600:33688599   | TCCATGCCAGCGAGCC               |
| 13    | Ccdc85a Forward | Chr11:28404600:28405199  | AGGTGGTTAGCGATTTGTGGA          |
| 14    | Ccdc85a Reverse | Chr11:28404600:28405199  | TGACTTTCTCCTTACACAAAATCAC      |
| 15    | Grk5 Forward    | Chr19:61000400:61000999  | AACCTGGTCTACAGAATGAGGACTG      |
| 16    | Grk5 Reverse    | Chr19:61000400:61000999  | CCAAGGACTTCTGAATACCATACTATG    |

|    |                     |                           |                           |
|----|---------------------|---------------------------|---------------------------|
|    |                     |                           |                           |
| 17 | AK139698<br>Forward | Chr14:54270800-54271199   | ACAGCGATTAGCACGTGAAGTG    |
| 18 | AK139698<br>Reverse | Chr14:54270800-54271199   | TCTCTCCTGACTAGCTGTGGTCTG  |
| 19 | S90647<br>Forward   | Chr13: 68481800- 68482199 | TGAGGGAGGAAATGGCGAG       |
| 20 | S90647<br>Reverse   | Chr13: 68481800- 68482199 | GGCCCAGCACCTCCCTAT        |
| 21 | DQ563521<br>Forward | Chr8:119753600- 119753999 | AGAAATATGCCTGCCTTTACCTCC  |
| 22 | DQ563521<br>Reverse | Chr8:119753600- 119753999 | AAA AGATAGGGAAAGCCGGG     |
| 23 | Tdpoz1 Forward      | Chr3: 93980800- 93981199  | TTGTGCTGTATTTTTTTTTTGCCA  |
| 24 | Tdpoz1 Reverse      | Chr3: 93980800- 93981199  | CAGGACTGTTTAGATGATTTGCAGG |
| 25 | Cd276 Forward       | Chr9:58370800:58371399    | GTAGAAACTATATCCCGCCCGA    |
| 26 | Cd276 Reverse       | Chr9:58370800:58371399    | TTCTTTAGATAGGAGCCCTTCTGG  |
| 27 | Gipc1 Forward       | Chr8:86172000- 86172399   | CCAGGGAGTGGCACTATTTGA     |
| 28 | Gipc1 Reverse       | Chr8:86172000- 86172399   | GAGACATTGGGCCTGGCAT       |
| 29 | Pgrmc2 Forward      | Chr3: 40868200-40868799   | AACTTGATCTCCCAGCTGCAAG    |
| 30 | Pgrmc2 Reverse      | Chr3: 40868200-40868799   | CACCTGCAATGGCTATTCCTG     |
