# Supplementary material for: Discovering Transcription Factor Binding Sites in Highly Repetitive Regions of Genomes with Multi-Read Analysis of ChIP-Seq Data
Source: PLoS Comput Biol. 2011 Jul 14;7(7):e1002111. doi: 10.1371/journal.pcbi.1002111 (PMC3136429; doi:10.1371/journal.pcbi.1002111)
Supplement: Table S1 — Summary of number of reads for short and long read datasets. “(C)” and “(I)” refer to ChIP and input samples, respectively. (PDF) [file pcbi.1002111.s022.pdf]

| Dataset      | # of all reads | # of alignable reads | # of unireads | # of multireads |
|--------------|----------------|----------------------|---------------|-----------------|
| STAT1(C)     | 76,913,219     | 28,180,625           | 23,011,726    | 5,168,899       |
| STAT1(I)     | 49,771,625     | 23,842,579           | 19,069,490    | 4,773,089       |
| GATA1(C)     | 33,124,216     | 26,259,170           | 22,462,757    | 3,796,413       |
| GATA1(I)     | 20,711,007     | 17,060,315           | 14,369,415    | 2,690,900       |
| MECP2-SET(C) | 15,253,906     | 12,084,960           | 9,924,831     | 2,160,129       |
| MECP2-SET(I) | 21,870,009     | 19,759,268           | 17,088,510    | 2,670,758       |
| MECP2-PET(C) | 18,622,331     | 12,765,663           | 11,963,876    | 801,787         |
| MECP2-PET(I) | 18,498,899     | 15,586,993           | 14,598,896    | 988,097         |
