# Supplementary material for: Discovering Transcription Factor Binding Sites in Highly Repetitive Regions of Genomes with Multi-Read Analysis of ChIP-Seq Data
Source: PLoS Comput Biol. 2011 Jul 14;7(7):e1002111. doi: 10.1371/journal.pcbi.1002111 (PMC3136429; doi:10.1371/journal.pcbi.1002111)
Supplement: Table S2 — Summary of the UR and MR peaks detected by the conditional binomial test. (PDF) [file pcbi.1002111.s023.pdf]

| Dataset | # of UR-only peaks | # of common peaks | # of MR-only peaks |
|---------|--------------------|-------------------|--------------------|
| STAT1   | 0                  | 37233             | 2965               |
| GATA1   | 0                  | 6148              | 2747               |
